# Supplementary material for: Comment on Pescott & Jitlal 2020: Failure to account for measurement error undermines their conclusion of a weak impact of nitrogen deposition on plant species richness
Source: bioRxiv preprint, doi:10.1101/2020.05.12.091272, version 1 (2020-05-14)

Supplementary Figure A: Estimated mean of the random spatial field fitted to the data using the SPDE approach in INLA.


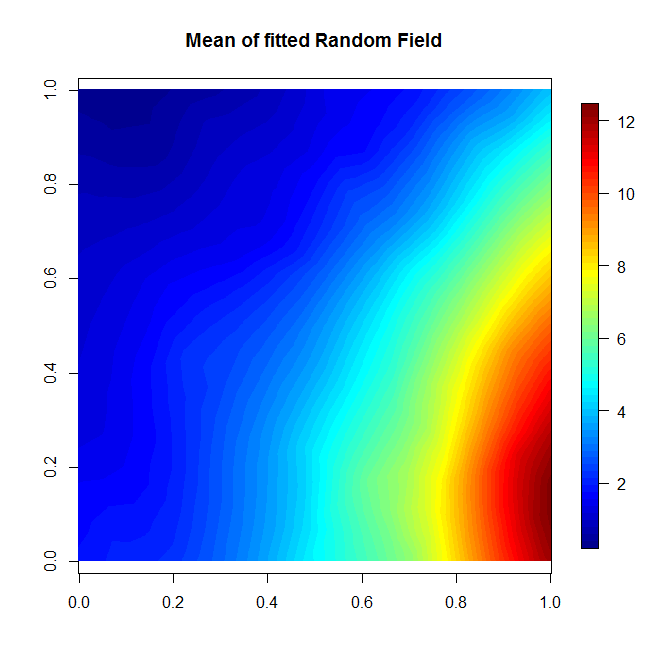

Supplement: Supplemental Fig A [file 091272_file02.docx]
